# Supplementary material for: Stability of sulfur molecules and insights into sulfur allotropy
Source: Royal Society of Chemistry journal article supplement (doi:10.1039/d2cp05498a), 2023-01-01
Supplement: d2cp05498a1.pdf [file d2cp05498a1.pdf]

## Supporting Information

### Stability of sulfur molecules and insights into sulfur allotropy

*Maria Fedyaeva,<sup>1,2,\*</sup> Sergey V. Lepeshkin,<sup>2,3,4</sup> and Artem R. Oganov<sup>3</sup>*

<sup>1</sup> Moscow State University, Leninskie Gory, Moscow 119991, Russia

<sup>2</sup> Vernadsky Institute of Geochemistry and Analytical Chemistry, Russian Academy of Sciences, Kosygina, 19, Moscow, 119991, Russia

<sup>3</sup> Skolkovo Institute of Science and Technology, Bolshoy Boulevard 30, bld. 1, Moscow 121205, Russia

<sup>4</sup> Lebedev Physical Institute, Russian Academy of Sciences, 53 Leninskii prosp., 119991 Moscow, Russia

S1. Atomic coordinates and total energies of all calculated ground-state structures of  $S_n$  molecules ( $2 \leq n \leq 21$ ) in the XYZ format.

2

$E_{\text{tot}} = -21671.58415$  eV

|   |              |              |               |
|---|--------------|--------------|---------------|
| S | 0.0000000000 | 0.0000000000 | 0.9637190000  |
| S | 0.0000000000 | 0.0000000000 | -0.9637190000 |

3

$E_{\text{tot}} = -32507.32539$  eV

|   |               |               |               |
|---|---------------|---------------|---------------|
| S | 1.6746230000  | -0.3343910000 | 0.0000000000  |
| S | 0.0000000000  | 0.6687750000  | -0.0000000000 |
| S | -1.6746230000 | -0.3343840000 | -0.0000000000 |

4

$E_{\text{tot}} = -43343.45311$  eV

|   |               |               |               |
|---|---------------|---------------|---------------|
| S | -1.6049580000 | 0.9354490000  | 0.0000240000  |
| S | -1.1128590000 | -0.9354840000 | -0.0000350000 |
| S | 1.1129120000  | -0.9354620000 | 0.0000350000  |
| S | 1.6049040000  | 0.9354960000  | -0.0000240000 |

5

$E_{\text{tot}} = -54179.80544$  eV

|   |               |               |               |
|---|---------------|---------------|---------------|
| S | -1.5206900000 | -0.5565990000 | -0.4631940000 |
| S | -1.1227180000 | 1.3769360000  | 0.1641920000  |
| S | -0.0058800000 | -1.6217630000 | 0.5982530000  |
| S | 1.5165210000  | -0.5677300000 | -0.4626250000 |
| S | 1.1327670000  | 1.3691560000  | 0.1633740000  |

6

$E_{\text{tot}} = -65016.34205$  eV

|   |               |               |               |
|---|---------------|---------------|---------------|
| S | 1.8434330000  | 0.5277580000  | -0.4522230000 |
| S | 1.3782040000  | -1.3331270000 | 0.4522270000  |
| S | -0.4648300000 | -1.8595930000 | -0.4525100000 |
| S | -1.8435120000 | -0.5275770000 | 0.4522140000  |
| S | -1.3783590000 | 1.3330030000  | -0.4521840000 |
| S | 0.4650640000  | 1.8595360000  | 0.4524770000  |

7

$E_{\text{tot}} = -75852.57994$  eV

|   |               |               |               |
|---|---------------|---------------|---------------|
| S | -0.4543020000 | -1.7822500000 | 0.7494920000  |
| S | -2.0213160000 | -1.1352070000 | -0.3628840000 |
| S | 2.3236290000  | 0.0005270000  | 0.2275120000  |
| S | 1.3151200000  | -1.6890430000 | -0.5002040000 |

|   |               |              |               |
|---|---------------|--------------|---------------|
| S | 1.3141290000  | 1.6896010000 | -0.4999850000 |
| S | -0.4554530000 | 1.7823330000 | 0.7493640000  |
| S | -2.0218070000 | 1.1340390000 | -0.3632960000 |

8

E\_tot = -86689.01395 eV

|   |               |               |               |
|---|---------------|---------------|---------------|
| S | 0.9290290000  | 2.2445550000  | 0.4968070000  |
| S | 2.2445550000  | -0.9290290000 | 0.4968070000  |
| S | -0.9290290000 | -2.2445550000 | 0.4968070000  |
| S | -2.2445550000 | 0.9290290000  | 0.4968070000  |
| S | -0.9292710000 | 2.2445550000  | -0.4968070000 |
| S | 2.2445550000  | 0.9292710000  | -0.4968070000 |
| S | 0.9292710000  | -2.2445550000 | -0.4968070000 |
| S | -2.2445550000 | -0.9292710000 | -0.4968070000 |

9

E\_tot = -97524.88454 eV

|   |               |               |               |
|---|---------------|---------------|---------------|
| S | -1.9252810000 | -0.9613700000 | 1.0744450000  |
| S | -1.1177920000 | 1.4460550000  | -1.2461830000 |
| S | -1.0501260000 | -2.4302730000 | -0.1513720000 |
| S | -2.7003360000 | 0.5738580000  | -0.1913420000 |
| S | -0.0001070000 | 2.7422220000  | -0.0001500000 |
| S | 1.9254920000  | -0.9607570000 | -1.0743820000 |
| S | 1.0505140000  | -2.4301510000 | 0.1511630000  |
| S | 1.1173220000  | 1.4463940000  | 1.2461630000  |
| S | 2.7003140000  | 0.5740220000  | 0.1916580000  |

10

E\_tot = -108361.02298 eV

|   |               |               |               |
|---|---------------|---------------|---------------|
| S | 2.8572120000  | -0.0037340000 | 1.0471000000  |
| S | -2.8572120000 | -0.0037340000 | -1.0471000000 |
| S | 2.8572120000  | 0.0037340000  | -1.0471000000 |
| S | -2.8572120000 | 0.0037340000  | 1.0471000000  |
| S | 1.2451710000  | -1.2359690000 | 1.6877600000  |
| S | -1.2451710000 | -1.2359690000 | -1.6877600000 |
| S | 1.2451710000  | 1.2359690000  | -1.6877600000 |
| S | -0.0000000000 | 0.0000000000  | -2.8478380000 |
| S | 0.0000000000  | -0.0000000000 | 2.8478380000  |
| S | -1.2451710000 | 1.2359690000  | 1.6877600000  |

11

E\_tot = -119197.16088 eV

|   |               |               |               |
|---|---------------|---------------|---------------|
| S | -0.6802740000 | 2.7173010000  | -0.8348620000 |
| S | 2.8296600000  | -1.3288080000 | -0.8111680000 |

|   |               |               |               |
|---|---------------|---------------|---------------|
| S | 2.5245240000  | 1.9507940000  | 0.2251390000  |
| S | 2.7592450000  | -0.0661330000 | 0.8649150000  |
| S | 0.6820020000  | 2.7169760000  | 0.8348600000  |
| S | 0.8561710000  | -1.7540510000 | -1.4326540000 |
| S | -2.5232270000 | 1.9524450000  | -0.2252100000 |
| S | -0.0010910000 | -3.0428960000 | -0.0001850000 |
| S | -2.7591860000 | -0.0646420000 | -0.8647050000 |
| S | -0.8572070000 | -1.7539640000 | 1.4326140000  |
| S | -2.8306180000 | -1.3270210000 | 0.8112560000  |

12

E\_tot = -130033.50977 eV

|   |               |               |               |
|---|---------------|---------------|---------------|
| S | -2.0489450000 | 1.4862220000  | -1.1489010000 |
| S | 2.3120550000  | 1.0309620000  | -1.1487010000 |
| S | -0.2630080000 | -2.5188960000 | -1.1475790000 |
| S | -2.3120550000 | -1.0309620000 | 1.1487010000  |
| S | 2.0489450000  | -1.4862220000 | 1.1489010000  |
| S | 0.2630080000  | 2.5188960000  | 1.1475790000  |
| S | -1.3968490000 | 3.1328630000  | -0.0016760000 |
| S | -3.4112110000 | 0.3564970000  | 0.0004590000  |
| S | 3.4112110000  | -0.3564970000 | -0.0004590000 |
| S | 2.0145750000  | 2.7764120000  | -0.0002710000 |
| S | -2.0145750000 | -2.7764120000 | 0.0002710000  |
| S | 1.3968490000  | -3.1328630000 | 0.0016760000  |

13

E\_tot = -140869.42193 eV

|   |               |               |               |
|---|---------------|---------------|---------------|
| S | 2.1389460000  | 2.9478860000  | -0.0950660000 |
| S | 0.3740380000  | 2.5277830000  | -1.1704970000 |
| S | -1.2489240000 | 3.3516220000  | -0.0867760000 |
| S | -2.1475870000 | 1.9346470000  | 1.1498980000  |
| S | 3.8357840000  | 0.0007920000  | -0.0006350000 |
| S | 2.6006380000  | 1.2909020000  | 1.1217840000  |
| S | -3.6381630000 | -1.0181340000 | 0.1372650000  |
| S | -2.1464090000 | -1.9362060000 | -1.1496540000 |
| S | -3.6381200000 | 1.0165550000  | -0.1387170000 |
| S | -1.2472340000 | -3.3518730000 | 0.0883480000  |
| S | 0.3756400000  | -2.5268390000 | 1.1710880000  |
| S | 2.6010190000  | -1.2902190000 | -1.1223680000 |
| S | 2.1403730000  | -2.9469170000 | 0.0953300000  |

14

E\_tot = -151705.69286 eV

|   |               |              |               |
|---|---------------|--------------|---------------|
| S | -1.6777500000 | 2.3342020000 | -1.1158580000 |
|---|---------------|--------------|---------------|

|   |               |               |               |
|---|---------------|---------------|---------------|
| S | -0.8262690000 | 3.3890470000  | 0.5036780000  |
| S | -3.5989740000 | 1.7254730000  | -0.4972200000 |
| S | -1.6791090000 | -2.3336510000 | -1.1160410000 |
| S | -3.4448260000 | 0.0006600000  | 0.7052630000  |
| S | -3.6000220000 | -1.7238250000 | -0.4973040000 |
| S | 2.8553640000  | 1.7322110000  | -1.0818680000 |
| S | 2.4429400000  | 2.6070200000  | 0.7959950000  |
| S | 0.5181120000  | 2.0591350000  | 1.4492970000  |
| S | 4.0257950000  | -0.0009250000 | -0.8136180000 |
| S | 0.5167430000  | -2.0592110000 | 1.4492270000  |
| S | -0.8281130000 | -3.3886640000 | 0.5034960000  |
| S | 2.4413640000  | -2.6079480000 | 0.7965120000  |
| S | 2.8547450000  | -1.7335240000 | -1.0815590000 |

15

E\_tot = -162541.79870 eV

|   |               |               |               |
|---|---------------|---------------|---------------|
| S | -3.2691130000 | -1.3262090000 | -0.9151980000 |
| S | -4.0203180000 | 0.6346250000  | -1.0512380000 |
| S | -2.4502580000 | 2.0063950000  | -1.3935590000 |
| S | -0.3646260000 | 2.2881130000  | 1.3703150000  |
| S | -2.0766190000 | 3.0530620000  | 0.4070630000  |
| S | 1.2751500000  | 3.4339660000  | 0.6935900000  |
| S | 2.2332860000  | 2.3801380000  | -0.8669900000 |
| S | -1.0584060000 | -1.3860650000 | 1.6343370000  |
| S | -3.0521650000 | -1.8343620000 | 1.1276630000  |
| S | 0.1221670000  | -3.1118620000 | 1.4088550000  |
| S | 0.4333050000  | -3.4909190000 | -0.6518750000 |
| S | 3.4125210000  | -1.8138490000 | -0.8782420000 |
| S | 1.4058790000  | -1.8469800000 | -1.5307890000 |
| S | 3.4559250000  | -0.4364620000 | 0.7218550000  |
| S | 3.9532740000  | 1.4504090000  | -0.0757870000 |

16

E\_tot = -173377.89488 eV

|   |               |               |               |
|---|---------------|---------------|---------------|
| S | 3.4374160000  | 0.4398790000  | 1.1159180000  |
| S | 3.8234910000  | 2.1888120000  | 0.0003270000  |
| S | 4.2517040000  | -1.1556610000 | 0.0007580000  |
| S | 2.7418860000  | -2.1192440000 | -1.1148210000 |
| S | -1.1555810000 | -4.2507320000 | -0.0006770000 |
| S | 0.4394770000  | -3.4363990000 | 1.1151850000  |
| S | 2.1889780000  | -3.8229330000 | 0.0005690000  |
| S | -0.4399190000 | 3.4365370000  | 1.1152100000  |
| S | -2.7414030000 | 2.1190900000  | -1.1155880000 |
| S | -3.4377140000 | -0.4398450000 | 1.1151330000  |

|   |               |               |               |
|---|---------------|---------------|---------------|
| S | -2.1194680000 | -2.7408070000 | -1.1157600000 |
| S | -3.8235200000 | -2.1888870000 | -0.0004280000 |
| S | 1.1556400000  | 4.2507700000  | -0.0000820000 |
| S | -2.1889210000 | 3.8229280000  | -0.0001870000 |
| S | -4.2515980000 | 1.1556080000  | -0.0004190000 |
| S | 2.1195340000  | 2.7408850000  | -1.1151410000 |

17

E\_tot = -184214.09871 eV

|   |               |               |               |
|---|---------------|---------------|---------------|
| S | 0.3835170000  | -3.1017390000 | 0.8744850000  |
| S | 1.3560620000  | 1.0279640000  | 1.6970250000  |
| S | 0.4496110000  | 2.8700930000  | 1.2227470000  |
| S | -4.8505420000 | -0.0003150000 | 0.0003120000  |
| S | -3.6362440000 | -1.6439180000 | -0.5220160000 |
| S | -2.9771520000 | -2.5786560000 | 1.2541600000  |
| S | -2.9775580000 | 2.5781550000  | -1.2539150000 |
| S | -3.6364020000 | 1.6435590000  | 0.5223660000  |
| S | -1.0638180000 | -1.7829040000 | 1.6574450000  |
| S | 3.4212650000  | 1.2680150000  | 2.0207650000  |
| S | 4.4930470000  | 1.0369870000  | 0.2194720000  |
| S | -1.0640280000 | 1.7828050000  | -1.6572880000 |
| S | 0.3830150000  | 3.1023620000  | -0.8751220000 |
| S | 4.4924700000  | -1.0379170000 | -0.2187320000 |
| S | 3.4214740000  | -1.2681050000 | -2.0206150000 |
| S | 0.4490770000  | -2.8690640000 | -1.2233480000 |
| S | 1.3562060000  | -1.0273230000 | -1.6977430000 |

18

E\_tot = -195050.32884 eV

|   |               |               |               |
|---|---------------|---------------|---------------|
| S | -3.4421840000 | 0.0505240000  | -1.6809010000 |
| S | -3.0072380000 | -2.8833830000 | 0.0356950000  |
| S | -4.0053630000 | -1.9824720000 | -1.5906260000 |
| S | 3.4420650000  | -0.0507580000 | -1.6809560000 |
| S | -1.0945810000 | -3.4840310000 | -0.6258600000 |
| S | 2.7229740000  | -2.7438390000 | 1.7097690000  |
| S | 4.8027640000  | -1.2028150000 | -0.5545150000 |
| S | 4.1785680000  | -1.2387190000 | 1.4617550000  |
| S | 0.8444470000  | -1.7859800000 | 1.6246140000  |
| S | 0.1753480000  | -1.8196550000 | -0.3794940000 |
| S | 4.0057140000  | 1.9821310000  | -1.5903720000 |
| S | 3.0074190000  | 2.8831290000  | 0.0357460000  |
| S | 1.0949720000  | 3.4841360000  | -0.6262090000 |
| S | -0.8445420000 | 1.7867820000  | 1.6243700000  |
| S | -0.1753740000 | 1.8201410000  | -0.3797580000 |

|   |               |              |               |
|---|---------------|--------------|---------------|
| S | -2.7232870000 | 2.7441580000 | 1.7092040000  |
| S | -4.1785300000 | 1.2385480000 | 1.4618110000  |
| S | -4.8031730000 | 1.2021060000 | -0.5542730000 |

19

E\_tot = -205886.44649 eV

|   |               |               |               |
|---|---------------|---------------|---------------|
| S | -4.7156160000 | 0.0166930000  | 1.2439230000  |
| S | -3.6395730000 | 2.6562520000  | -0.6943700000 |
| S | -5.1717960000 | 1.9647050000  | 0.5818940000  |
| S | -2.1197390000 | 3.5121150000  | 0.4950100000  |
| S | 2.1195990000  | 3.5120100000  | -0.4950710000 |
| S | 0.6543310000  | 2.0305190000  | -0.8286520000 |
| S | -0.6544270000 | 2.0307070000  | 0.8288630000  |
| S | -5.4310240000 | -1.3580600000 | -0.1916170000 |
| S | -3.8373240000 | -1.7521290000 | -1.5174150000 |
| S | -2.7876470000 | -3.4386280000 | -0.8161790000 |
| S | 4.7157660000  | 0.0164950000  | -1.2438470000 |
| S | 2.7879520000  | -3.4384860000 | 0.8161090000  |
| S | 3.6396250000  | 2.6563030000  | 0.6942330000  |
| S | 5.1717090000  | 1.9647560000  | -0.5821170000 |
| S | 5.4312050000  | -1.3577840000 | 0.1918790000  |
| S | 3.8370330000  | -1.7521710000 | 1.5175070000  |
| S | 1.5426760000  | -2.8221580000 | -0.7772630000 |
| S | 0.0000740000  | -1.6187870000 | 0.0000230000  |
| S | -1.5428240000 | -2.8223530000 | 0.7770920000  |

20

E\_tot = -216722.46678 eV

|   |               |               |               |
|---|---------------|---------------|---------------|
| S | 2.8566850000  | 3.8417290000  | 0.4539030000  |
| S | 0.0000350000  | 1.9849410000  | 0.0000890000  |
| S | 1.4392020000  | 3.1832290000  | -0.9618200000 |
| S | 3.9604100000  | 2.1626410000  | 1.1074160000  |
| S | 5.1534010000  | 1.5312440000  | -0.5092560000 |
| S | 4.0883930000  | -0.0601220000 | -1.4143590000 |
| S | -2.8565490000 | 3.8418960000  | -0.4540030000 |
| S | -1.4391030000 | 3.1834900000  | 0.9617650000  |
| S | -3.9603750000 | 2.1627410000  | -1.1074460000 |
| S | -5.1532450000 | 1.5313330000  | 0.5092880000  |
| S | -4.0883050000 | -0.0600470000 | 1.4144100000  |
| S | -2.5989460000 | -3.7419390000 | -0.7824360000 |
| S | -4.2625240000 | -2.4639500000 | -1.0985740000 |
| S | -0.0001080000 | -1.5811920000 | -0.0000730000 |
| S | 0.8577390000  | -2.8039440000 | 1.4907340000  |
| S | 4.9954200000  | -1.8510460000 | -0.7780450000 |

|   |               |               |               |
|---|---------------|---------------|---------------|
| S | 2.5987750000  | -3.7418590000 | 0.7825210000  |
| S | 4.2624850000  | -2.4640620000 | 1.0986330000  |
| S | -4.9954690000 | -1.8509190000 | 0.7780540000  |
| S | -0.8579210000 | -2.8041640000 | -1.4908010000 |

21

E\_tot = -227558.63640 eV

|   |               |               |               |
|---|---------------|---------------|---------------|
| S | 1.5768550000  | 1.4828340000  | -0.6845360000 |
| S | 4.7270090000  | 2.4464640000  | 0.2422710000  |
| S | -2.3915250000 | 3.3589640000  | -0.8704320000 |
| S | -5.5102370000 | 0.4379910000  | 0.6904860000  |
| S | -3.7049260000 | 1.2410670000  | 1.4237350000  |
| S | -0.5582320000 | 4.1589610000  | -0.2010940000 |
| S | 0.5655520000  | 2.6546530000  | 0.7516270000  |
| S | -3.6721870000 | 3.2641040000  | 0.8083800000  |
| S | 1.4317320000  | -2.2741940000 | 1.8075270000  |
| S | 2.0046250000  | -3.3690760000 | 0.0931450000  |
| S | 5.6410160000  | -0.8376620000 | 0.7513280000  |
| S | 6.1696100000  | 0.9822460000  | -0.1962690000 |
| S | 3.2833630000  | 2.5581170000  | -1.3007380000 |
| S | 3.0652330000  | -2.0839420000 | -1.1969620000 |
| S | 5.1209930000  | -2.2218380000 | -0.7469810000 |
| S | -2.8982870000 | -2.5698330000 | -1.6159710000 |
| S | -0.2581070000 | -1.1292910000 | 1.2839800000  |
| S | -2.3455150000 | -3.5961740000 | 0.1298240000  |
| S | -2.0037770000 | -2.2300220000 | 1.7054640000  |
| S | -5.2644550000 | -0.1002710000 | -1.3415380000 |
| S | -4.9787430000 | -2.1730990000 | -1.5332450000 |



S2. Frequencies of  $S_n$  molecules ( $2 \leq n \leq 21$ )

$S_2$ :  
682.9

$S_3$ :  
258.4          561.9          638.8

$S_4$ :  
85.8          204.4          304.3  
318.8          622.1          648.6

$S_5$ :  
93.1          217.3          273.2  
285.1          303.5          305.5  
397.3          473.0          479.7

$S_6$ :  
157.8          158.4          195.4  
195.6          252.6          305.3  
308.7          404.5          404.95  
428.7          429.0          450.95

$S_7$ :  
57.2          124.2          147.8  
163.8          188.6          226.8  
257.8          281.6          314.5  
331.3          345.0          420.9  
454.2          491.5          501.2

$S_8$ :  
71.2          71.97          140.9  
141.0          185.8          185.8  
207.8          235.1          241.0  
241.0          342.5          376.6  
376.6          431.2          432.7  
437.9          447.9

$S_9$ :  
48.7          64.5          79.9  
91.1          138.8          149.7  
168.4          206.6          208.8  
240.2          244.1          293.0  
348.6          352.5          386.1  
395.7          422.6          426.2  
428.6          447.7          453.1

$S_{10}$ :  
32.5          32.6          68.9  
68.9          143.5          143.5

|       |       |       |
|-------|-------|-------|
| 167.0 | 175.4 | 175.4 |
| 189.6 | 199.9 | 200.0 |
| 207.9 | 207.9 | 333.1 |
| 368.4 | 368.6 | 412.8 |
| 413.0 | 434.9 | 435.0 |
| 435.1 | 435.3 | 444.2 |

S<sub>11</sub>:

|       |       |       |
|-------|-------|-------|
| 29.8  | 38.3  | 52.3  |
| 56.5  | 89.9  | 102.2 |
| 125.9 | 155.9 | 161.8 |
| 164.0 | 193.5 | 204.8 |
| 211.1 | 234.8 | 253.5 |
| 275.1 | 334.6 | 346.7 |
| 385.9 | 386.4 | 419.4 |
| 429.4 | 429.9 | 434.2 |
| 445.0 | 445.7 | 453.8 |

S<sub>12</sub>:

|       |       |       |
|-------|-------|-------|
| 40.3  | 40.5  | 41.8  |
| 42.0  | 66.0  | 75.0  |
| 100.4 | 140.2 | 152.3 |
| 152.4 | 173.7 | 174.0 |
| 232.9 | 232.9 | 244.7 |
| 244.8 | 264.9 | 281.9 |
| 338.3 | 360.8 | 360.9 |
| 400.4 | 400.6 | 426.7 |
| 428.2 | 429.3 | 434.3 |
| 434.3 | 441.4 | 441.5 |

S<sub>13</sub>:

|       |       |       |
|-------|-------|-------|
| 12.6  | 29.5  | 36.7  |
| 39.3  | 57.4  | 67.5  |
| 82.9  | 98.1  | 120.4 |
| 127.9 | 152.7 | 160.7 |
| 174.7 | 178.9 | 219.7 |
| 221.9 | 228.7 | 236.9 |
| 257.4 | 267.8 | 336.6 |
| 345.6 | 373.1 | 376.2 |
| 405.7 | 411.0 | 429.8 |
| 433.1 | 437.5 | 440.5 |
| 448.7 | 451.5 | 476.4 |

S<sub>14</sub>:

|      |      |       |
|------|------|-------|
| 23.8 | 29.7 | 30.5  |
| 36.7 | 57.6 | 60.6  |
| 61.8 | 68.6 | 108.8 |

|       |       |       |
|-------|-------|-------|
| 114.6 | 152.5 | 155.8 |
| 160.5 | 178.9 | 185.5 |
| 206.4 | 222.5 | 232.2 |
| 235.8 | 244.5 | 251.6 |
| 265.2 | 338.9 | 355.9 |
| 357.4 | 391.1 | 391.2 |
| 418.8 | 421.4 | 429.4 |
| 431.6 | 436.6 | 436.8 |
| 438.1 | 446.6 | 451.4 |

S<sub>15</sub>:

|       |       |       |
|-------|-------|-------|
| 15.9  | 24.6  | 27.3  |
| 40.0  | 49.6  | 50.5  |
| 55.7  | 58.2  | 73.5  |
| 95.0  | 108.3 | 146.3 |
| 156.5 | 158.4 | 171.9 |
| 179.7 | 197.9 | 217.5 |
| 227.4 | 228.9 | 244.2 |
| 250.3 | 258.9 | 278.9 |
| 341.1 | 348.3 | 369.0 |
| 370.6 | 401.1 | 402.6 |
| 418.7 | 426.6 | 427.0 |
| 431.0 | 436.2 | 439.5 |
| 443.0 | 446.6 | 450.8 |

S<sub>16</sub>:

|       |       |       |
|-------|-------|-------|
| 15.4  | 16.0  | 29.4  |
| 29.5  | 50.4  | 50.4  |
| 53.2  | 53.2  | 58.5  |
| 73.8  | 83.7  | 125.1 |
| 125.1 | 157.1 | 165.0 |
| 165.0 | 184.3 | 184.4 |
| 199.0 | 199.1 | 235.9 |
| 235.9 | 237.8 | 237.8 |
| 253.8 | 257.1 | 338.1 |
| 351.9 | 351.9 | 381.0 |
| 381.1 | 409.5 | 409.6 |
| 426.4 | 429.6 | 434.7 |
| 438.7 | 438.7 | 439.5 |
| 439.5 | 443.9 | 444.0 |

S<sub>17</sub>:

|      |      |      |
|------|------|------|
| 19.1 | 20.3 | 32.4 |
| 32.4 | 40.2 | 41.8 |
| 46.7 | 48.9 | 60.9 |

|       |       |       |
|-------|-------|-------|
| 63.1  | 72.5  | 99.1  |
| 106.9 | 126.2 | 129.8 |
| 155.4 | 163.6 | 178.7 |
| 194.4 | 207.9 | 216.7 |
| 222.5 | 239.0 | 248.7 |
| 254.0 | 259.2 | 267.8 |
| 274.6 | 342.1 | 344.8 |
| 362.4 | 366.5 | 392.0 |
| 394.7 | 417.9 | 419.1 |
| 422.7 | 425.5 | 429.0 |
| 433.4 | 434.5 | 435.0 |
| 441.6 | 449.8 | 450.3 |

S<sub>18</sub>:

|       |       |       |
|-------|-------|-------|
| 19.0  | 26.7  | 31.0  |
| 32.6  | 33.6  | 39.4  |
| 44.8  | 56.0  | 58.1  |
| 61.2  | 64.7  | 82.9  |
| 93.1  | 107.7 | 123.5 |
| 147.3 | 154.8 | 161.3 |
| 178.1 | 192.8 | 196.5 |
| 217.5 | 222.9 | 231.5 |
| 241.8 | 246.4 | 252.8 |
| 263.1 | 267.9 | 273.1 |
| 339.6 | 348.9 | 351.2 |
| 373.8 | 374.3 | 398.9 |
| 401.3 | 420.1 | 422.1 |
| 429.4 | 429.5 | 433.2 |
| 435.0 | 437.7 | 438.2 |
| 439.6 | 443.2 | 443.3 |

S<sub>19</sub>:

|       |       |       |
|-------|-------|-------|
| 16.8  | 19.0  | 24.3  |
| 28.6  | 32.0  | 35.8  |
| 36.1  | 41.9  | 47.7  |
| 53.0  | 58.4  | 64.2  |
| 81.3  | 83.1  | 97.6  |
| 112.6 | 144.2 | 146.7 |
| 161.6 | 164.8 | 186.6 |
| 192.3 | 209.0 | 218.6 |
| 238.4 | 239.4 | 248.8 |
| 250.2 | 262.9 | 266.3 |
| 273.9 | 284.5 | 341.7 |
| 342.2 | 358.1 | 361.3 |
| 385.1 | 385.2 | 408.8 |
| 409.7 | 423.2 | 426.0 |

|       |       |       |
|-------|-------|-------|
| 427.9 | 428.3 | 431.7 |
| 432.0 | 433.9 | 438.5 |
| 438.7 | 443.7 | 444.3 |

S<sub>20</sub>:

|       |       |        |
|-------|-------|--------|
| 11.2  | 14.6  | 18.3   |
| 23.3  | 24.3  | 27.2   |
| 30.1  | 42.2  | 43.8   |
| 46.3  | 50.2  | 64.8   |
| 73.2  | 79.2  | 87.4   |
| 93.2  | 107.2 | 125.0  |
| 139.4 | 161.8 | 169.4  |
| 178.3 | 178.7 | 201.1  |
| 210.1 | 223.7 | 236.7  |
| 238.5 | 239.9 | 252.6  |
| 253.3 | 263.4 | 266.0  |
| 284.3 | 339.4 | 348.37 |
| 350.3 | 370.5 | 374.4  |
| 396.1 | 399.6 | 418.9  |
| 419.4 | 421.8 | 424.6  |
| 427.1 | 432.3 | 432.6  |
| 433.9 | 434.2 | 437.8  |

S<sub>21</sub>:

|       |       |       |
|-------|-------|-------|
| 12.9  | 14.0  | 20.6  |
| 25.1  | 27.5  | 28.6  |
| 32.1  | 35.4  | 41.4  |
| 45.8  | 53.3  | 54.4  |
| 59.6  | 68.6  | 78.6  |
| 91.2  | 104.4 | 121.1 |
| 136.3 | 145.3 | 157.9 |
| 168.6 | 169.7 | 182.9 |
| 194.9 | 204.5 | 209.6 |
| 222.4 | 231.3 | 234.7 |
| 240.4 | 246.1 | 261.0 |
| 262.6 | 265.9 | 271.7 |
| 339.6 | 340.8 | 355.4 |
| 356.3 | 378.0 | 380.8 |
| 402.2 | 403.6 | 420.6 |
| 421.3 | 426.0 | 427.8 |
| 431.5 | 432.6 | 434.2 |
| 435.2 | 435.8 | 440.7 |
| 443.6 | 444.4 | 449.2 |

Table S1. Fragmentation energies and fission products of  $S_n$  molecules with  $n = 2 - 21$ .

| Molecule | Fission products | Fragmentation energy, eV |
|----------|------------------|--------------------------|
| $S_2$    | $S_1 + S_1$      | 4.07                     |
| $S_3$    | $S_1 + S_2$      | 1.98                     |
| $S_4$    | $S_2 + S_2$      | 0.28                     |
| $S_5$    | $S_2 + S_3$      | 0.90                     |
| $S_6$    | $S_2 + S_4$      | 1.30                     |
| $S_7$    | $S_2 + S_5$      | 1.19                     |
| $S_8$    | $S_2 + S_6$      | 1.09                     |
| $S_9$    | $S_2 + S_7$      | 0.72                     |
| $S_{10}$ | $S_2 + S_8$      | 0.42                     |
| $S_{11}$ | $S_2 + S_9$      | 0.69                     |
| $S_{12}$ | $S_6 + S_6$      | 0.83                     |
| $S_{13}$ | $S_6 + S_7$      | 0.50                     |
| $S_{14}$ | $S_6 + S_8$      | 0.34                     |
| $S_{15}$ | $S_7 + S_8$      | 0.20                     |
| $S_{16}$ | $S_8 + S_8$      | -0.13                    |
| $S_{17}$ | $S_8 + S_9$      | 0.20                     |
| $S_{18}$ | $S_8 + S_{10}$   | 0.29                     |
| $S_{19}$ | $S_8 + S_{11}$   | 0.27                     |
| $S_{20}$ | $S_8 + S_{12}$   | -0.06                    |
| $S_{21}$ | $S_8 + S_{13}$   | 0.20                     |
